# Supplementary material
Source: MDPI journal article supplement (https://www.mdpi.com/2072-4292/15/18/4361)
Supplement: s1 [file s1]

## Supplementary Material

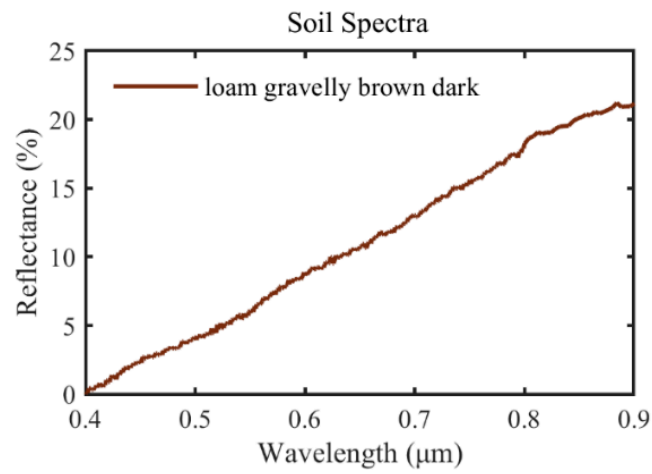

**Figure S1.** Soil spectra called “loam\_gravelly\_brown\_dark” used in the DART model (from the DART model database “Lambertian.db”).

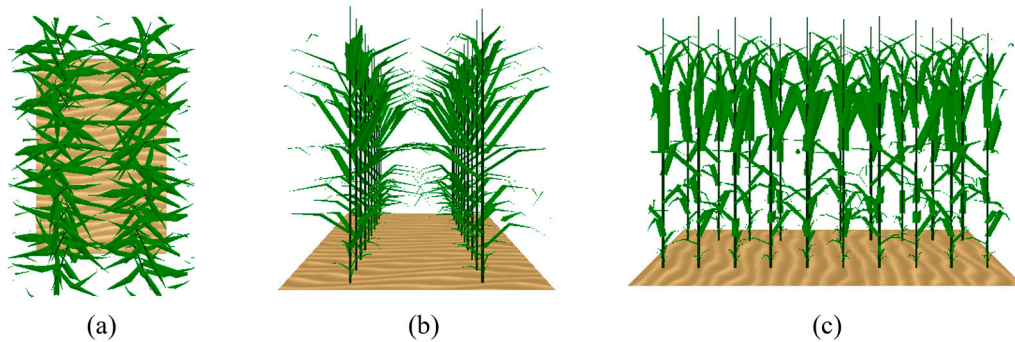

**Figure S2.** (a) Nadir and (b,c) side view of the 3-D canopy of maize simulated using the DART model. The size of the scene is  $1.5 \text{ m} \times 1 \text{ m}$ , and 20 maize are planted in two rows, with 10 in each row.

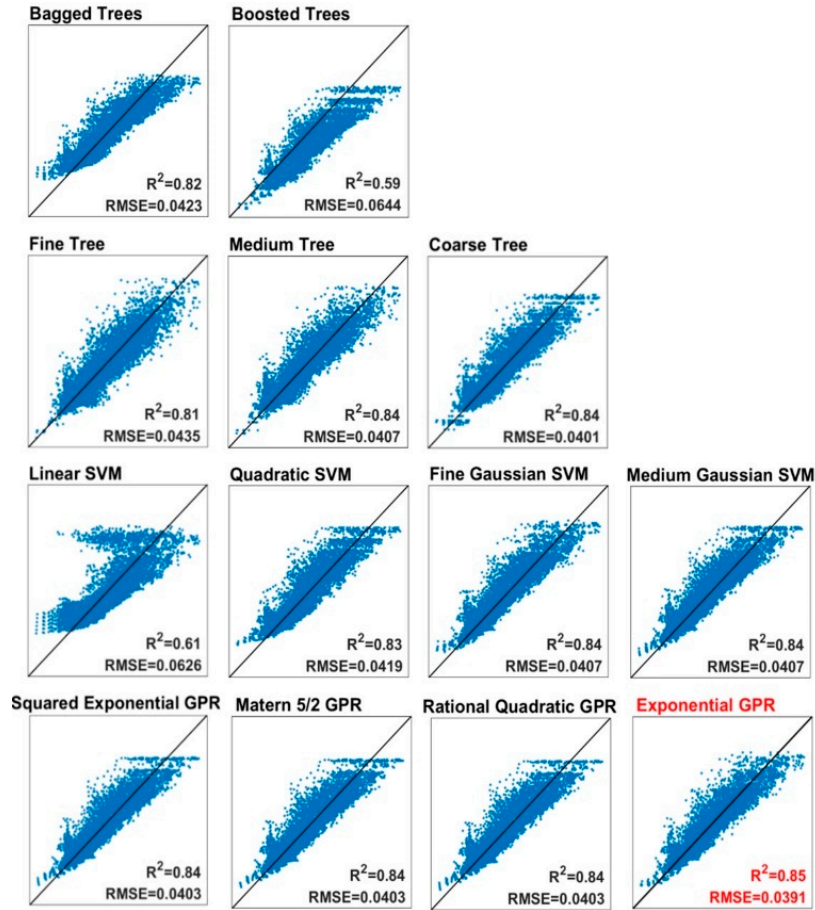

**Figure S3.** Training performance (Predicted vs. Actual) of machine learning algorithms based on 5-fold cross-validation method when the input parameters are soil reflectance at 780 nm and NDVI.

**Table S1.** The main parameters of the GPR model when using MATLAB to fit Gaussian process regression.

| Parameters      | Description                                | Value         |
|-----------------|--------------------------------------------|---------------|
| FitMethod       | Method for estimating GPR model Parameters | 'SD'          |
| BasisFunction   | Explicit basis in GPR model                | 'Constant'    |
| Standardize     | Indicator of standardized data             | 1             |
| KernelFunction  | Form of covariance function                | 'Exponential' |
| ActiveSetMethod | Method for active set selection            | 'Random'      |
| ActiveSetSize   | Active set size                            | 2000          |
| PredictMethod   | Method for prediction                      | 'Exact'       |

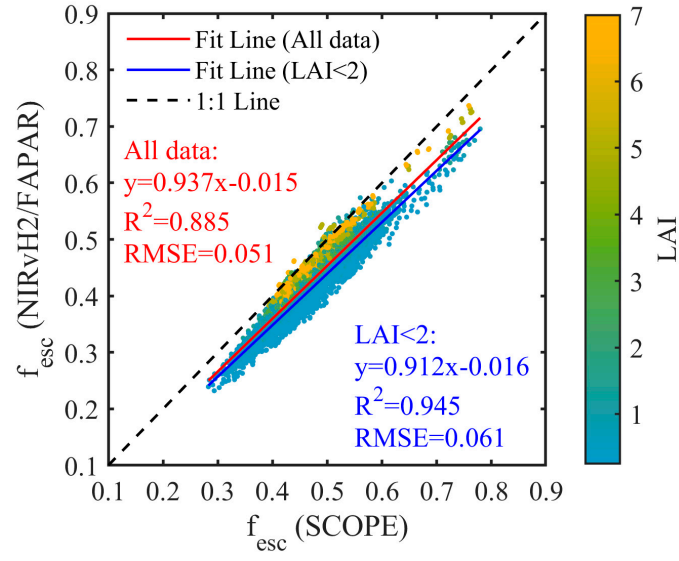

**Figure S4.** Comparison of  $f_{esc}$  in the near-infrared band (760 nm) estimated by the NIRvH2/FAPAR model with the  $f_{esc}$  simulated by the SCOPE model.  $R^2$  is the correlation coefficient of linear regression, and RMSE is the root mean square error between  $f_{esc}$  (SCOPE) and the  $f_{esc}$  values calculated by the NIRvH2/FAPAR model.
